# Supplementary material for: Anti-Melanogenic Properties of Greek Plants. A Novel Depigmenting Agent from Morus alba Wood
Source: PubMed Central journal article supplement (PMC6154579; doi:10.3390/molecules22040514), 2017-03-23
Supplement: molecules-22-00514-s001.pdf [file molecules-22-00514-s001.pdf]

## Supplementary Data

Table S1. Greek extracts that exhibited moderate and strong tyrosinase inhibition at initial concentration screens (300 µg/ml)

| Plant species                                      | Plant family  | Plant part                | Extraction solvent | % Tyrosinase inhibition |
|----------------------------------------------------|---------------|---------------------------|--------------------|-------------------------|
| <i>Abies cephalonica</i>                           | Pinaceae      | bark of stem and branches | MeOH               | 59                      |
| <i>Acantholimon androsaceum</i>                    | Plubaginaceae | aerial parts              | MeOH               | 55                      |
| <i>Acanthus spinosus</i>                           | Acanthaceae   | aerial parts              | EtOAc              | 48                      |
| <i>Anthyllis montana</i>                           | Leguminosae   | aerial parts              | EtOAc              | 48                      |
| <i>Anthyllis montana</i>                           | Leguminosae   | aerial parts              | MeOH               | 46                      |
| <i>Arbutus unedo</i>                               | Ericaceae     | stems and leaves          | MeOH               | 50                      |
| <i>Arbutus unedo</i>                               | Ericaceae     | stems and leaves          | EtOAc              | 44                      |
| <i>Armeria canescens</i>                           | Plubaginaceae | aerial parts and roots    | MeOH               | 76                      |
| <i>Calicotome villosa</i>                          | Leguminosae   | aerial parts              | MeOH               | 44                      |
| <i>Ceratonia siliqua</i>                           | Leguminosae   | stems and leaves          | MeOH               | 57                      |
| <i>Ceratonia siliqua</i>                           | Leguminosae   | stems and leaves          | EtOAc              | 44                      |
| <i>Cercis siliquastrum</i>                         | Leguminosae   | aerial parts              | MeOH               | 70                      |
| <i>Chamaecytisus austriacus</i>                    | Leguminosae   | aerial parts              | MeOH               | 46                      |
| <i>Chamaecytisus triflorus</i>                     | Leguminosae   | aerial parts              | MeOH               | 47                      |
| <i>Chamaecytisus triflorus</i>                     | Leguminosae   | aerial parts              | EtOAc              | 40                      |
| <i>Cistus creticus ssp. creticus</i>               | Cistaceae     | aerial parts              | MeOH               | 63                      |
| <i>Cistus creticus ssp. eriocephalus</i>           | Cistaceae     | aerial parts              | MeOH               | 58                      |
| <i>Cistus monspeliensis</i>                        | Cistaceae     | aerial parts              | MeOH               | 41                      |
| <i>Cistus parviflorus</i>                          | Cistaceae     | aerial parts              | MeOH               | 68                      |
| <i>Cistus salvifolius</i>                          | Cistaceae     | aerial parts              | MeOH               | 79                      |
| <i>Cistus salvifolius</i>                          | Cistaceae     | aerial parts              | EtOAc              | 71                      |
| <i>Cotinus coggygria (Rhus cotinus)</i>            | Anacardiaceae | stems and leaves          | MeOH               | 43                      |
| <i>Cupressus sempervirens (forma horizontalis)</i> | Cupressaceae  | branches and leaves       | EtOAc              | 47                      |
| <i>Cytisus villosus</i>                            | Leguminosae   | aerial parts              | MeOH               | 49                      |
| <i>Dorycnium hirsutum</i>                          | Leguminosae   | aerial parts              | MeOH               | 56                      |
| <i>Dorycnium hirsutum</i>                          | Leguminosae   | aerial parts              | EtOAc              | 44                      |
| <i>Eryngium amorginum</i>                          | Umbelliferae  | aerial parts              | EtOAc              | 56                      |
| <i>Genista depressa</i>                            | Leguminosae   | aerial parts and roots    | EtOAc              | 53                      |
| <i>Geranium macrorrhizum</i>                       | Geraniaceae   | aerial parts and roots    | MeOH               | 55                      |
| <i>Glycyrrhiza glabra</i>                          | Leguminosae   | roots                     | MeOH               | 92                      |
| <i>Glycyrrhiza glabra</i>                          | Leguminosae   | roots                     | EtOAc              | 82                      |
| <i>Heracleum sphondylium ssp. pyrenaicum</i>       | Umbelliferae  | aerial parts              | EtOAc              | 43                      |
| <i>Hippocrepis comosa</i>                          | Leguminosae   | aerial parts              | MeOH               | 55                      |
| <i>Hippocrepis comosa</i>                          | Leguminosae   | aerial parts              | EtOAc              | 54                      |

|                                      |               |                        |       |    |
|--------------------------------------|---------------|------------------------|-------|----|
| <i>Lathyrus clymenum</i>             | Leguminosae   | perisperm              | MeOH  | 92 |
| <i>Lathyrus clymenum</i>             | Leguminosae   | perisperm              | EtOAc | 59 |
| <i>Mentha pulegium</i>               | Lamiaceae     | aerial parts           | EtOAc | 43 |
| <i>Morus alba</i>                    | Moraceae      | wood                   | MeOH  | 97 |
| <i>Morus alba</i>                    | Moraceae      | wood                   | EtOAc | 83 |
| <i>Myrtus communis</i>               | Myrtaceae     | aerial parts           | MeOH  | 45 |
| <i>Onobrychis alba ssp. laconica</i> | Leguminosae   | aerial parts and roots | EtOAc | 43 |
| <i>Onobrychis peloponnesiaca</i>     | Leguminosae   | roots                  | EtOAc | 42 |
| <i>Paenia clusii ssp. clusii</i>     | Paeoniaceae   | aerial parts           | MeOH  | 49 |
| <i>Paenia mascula ssp. hellenica</i> | Paeoniaceae   | aerial parts           | MeOH  | 68 |
| <i>Pinus nigra ssp. pallasiana</i>   | Pinaceae      | bark                   | MeOH  | 40 |
| <i>Pistacia lentiscus</i>            | Anacardiaceae | branches and leaves    | MeOH  | 76 |
| <i>Pistacia lentiscus</i>            | Anacardiaceae | wood                   | MeOH  | 57 |
| <i>Pistacia terebinthus</i>          | Anacardiaceae | leaves and stems       | MeOH  | 70 |
| <i>Pistacia terebinthus</i>          | Anacardiaceae | branches and leaves    | MeOH  | 67 |
| <i>Polygonum idaeum</i>              | Leguminosae   | aerial parts and roots | MeOH  | 59 |
| <i>Saxifraga sp.</i>                 | Saxifragaceae | aerial parts and roots | MeOH  | 45 |
| <i>Sedum sediforme</i>               | Crassulaceae  | aerial parts           | MeOH  | 70 |
| <i>Sinapis alba</i>                  | Cruciferae    | aerial parts           | EtOAc | 41 |
| <i>Umbilicus horizontalis</i>        | Crassulaceae  | aerial parts and roots | MeOH  | 81 |
| <i>Veratrum album</i>                | Liliaceae     | aerial parts and roots | MeOH  | 78 |
| <i>Veratrum album</i>                | Liliaceae     | aerial parts and roots | EtOAc | 59 |

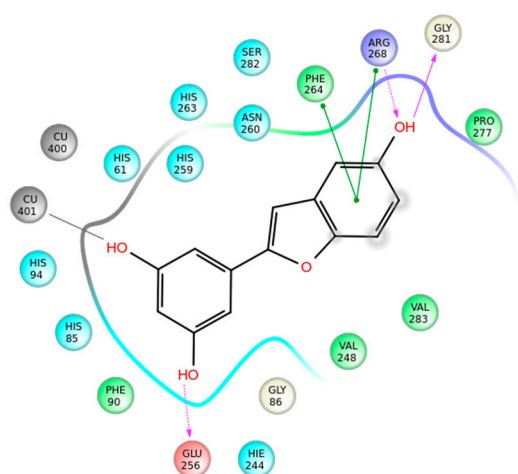

Supplementary Figure S1: Ligand Interaction Diagram of Low Energy Structure of Mushroom Tyrosinase in complex with **11**

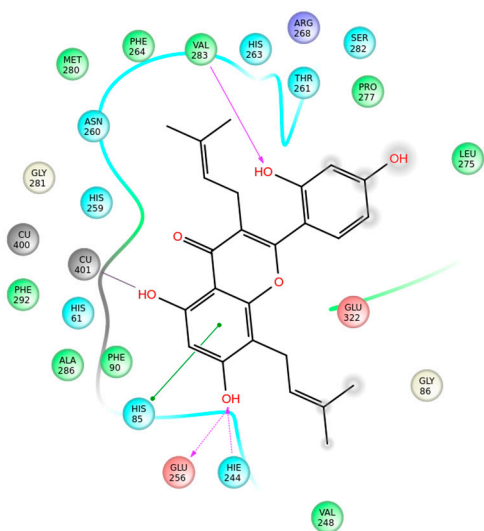

Figure S2: Ligand Interaction Diagram of Low Energy Structure of Mushroom Tyrosinase in complex with **2**

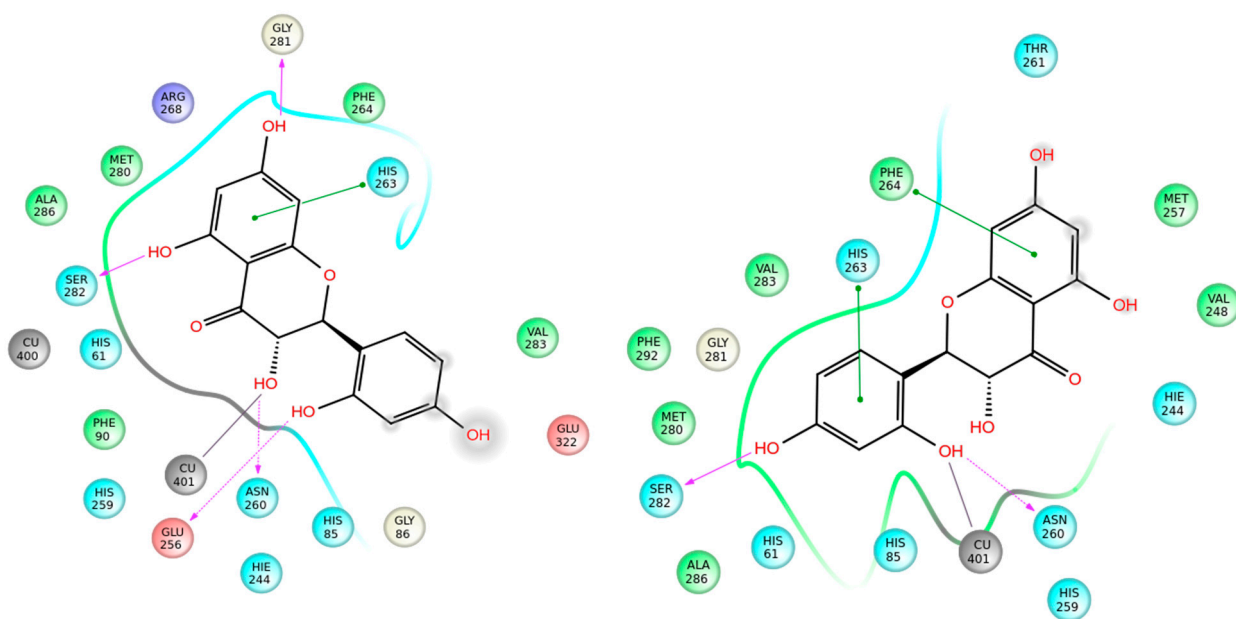

Figure S3: Ligand Interaction Diagram of Low Energy Structure of Mushroom Tyrosinase in complex with **6**, RR enantiomer (left) and SS enantiomer (right).
